# Supplementary material
Source: MDPI journal article supplement (https://www.mdpi.com/2071-1050/13/17/9925)
Supplement: s1 [file s1]

Supplementary file

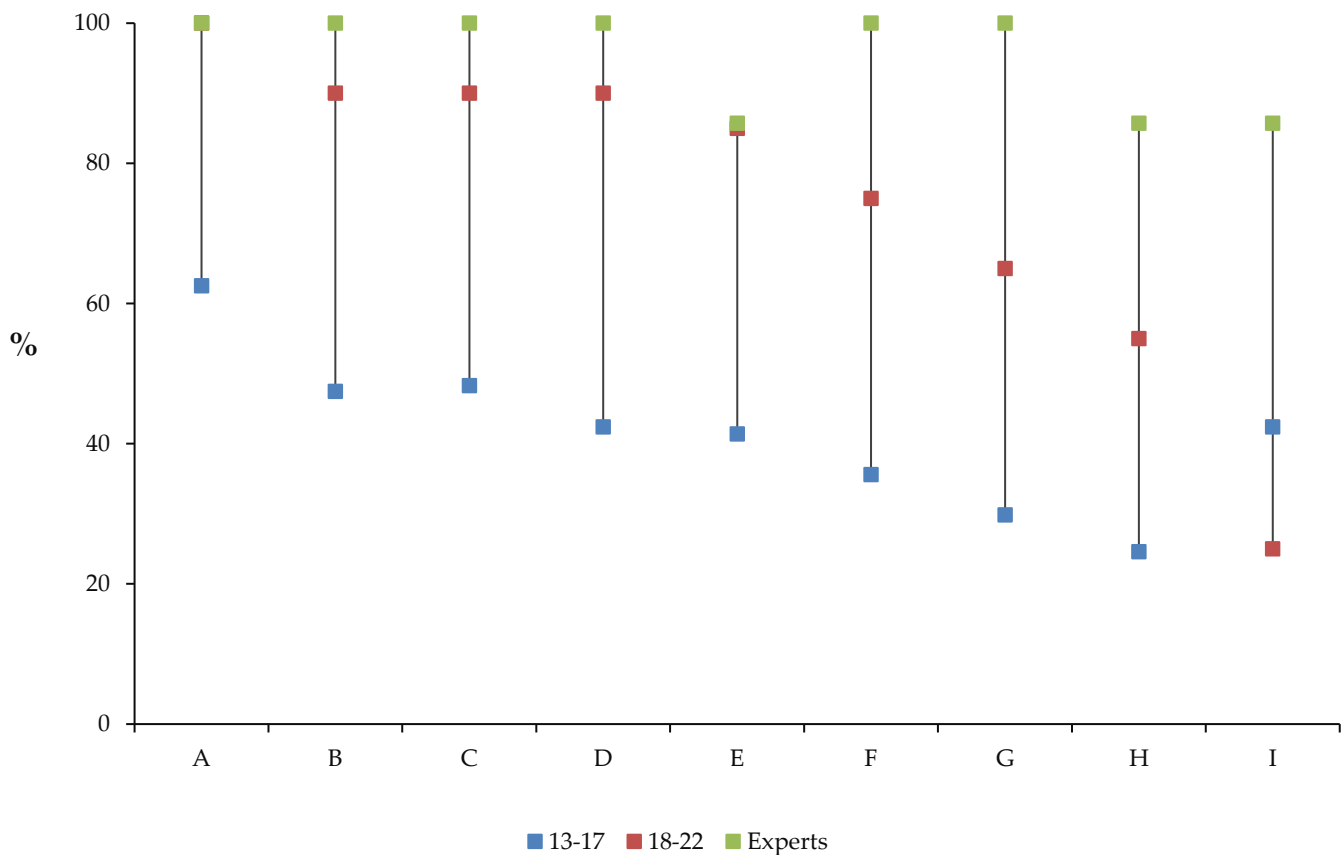

**Figure S1.** Proportions of the answers concerning the highly valued importance of plants. Abbreviations: A = Plants photosynthesize. B = Plants provide fresh oxygen to breathe. C = Plants help in reducing the pollution level by taking carbon dioxide and giving out the oxygen. D = Plants provide a habitat for other plants, animals, including humans, and microbes. E = Plants play an important role in influencing the climate. F = They are the primary source of food for a number of birds, animals, and other organisms. G = They, especially trees, reduce erosion and prevent flooding. H = A number of medicines are made by plants. I = The woods that you get from plants can be used for a number of purposes. They are the source of furniture and provide shelter to many species.
