# Supplementary material
Source: MDPI journal article supplement (https://www.mdpi.com/2071-1050/13/17/9925)
Supplement: s1 [file s1]

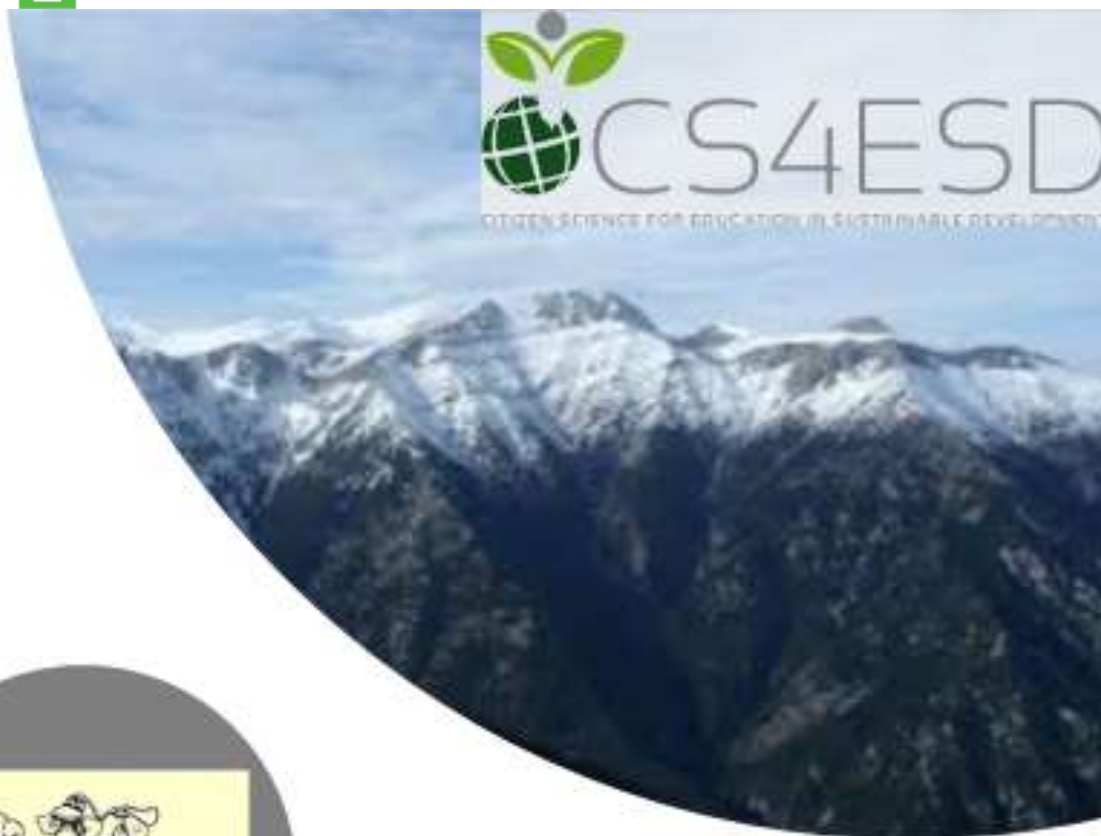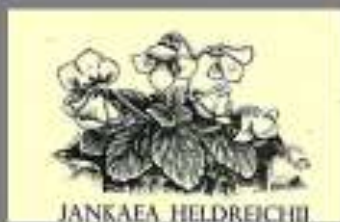

*Covid  
edition*

Field tour questionnaire  
&  
Forest vegetation protocol

Mount  
Olympus  
Biosphere  
Reserve

**i** *Mount Olympus is a protected area located in northern Greece, on the border between Thessaly and Macedonia. Due to its outstanding natural and cultural importance, Olympus was designated as a Biosphere Reserve in 1981.*

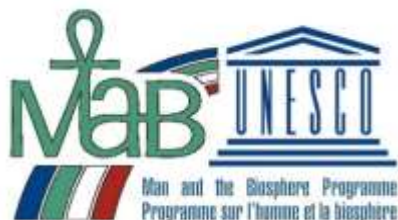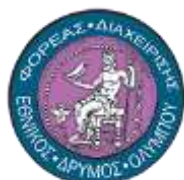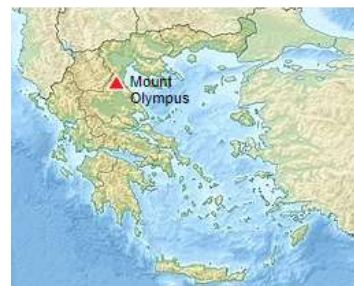

This is the tour that we could make around the Mount Olympus biosphere reserve:

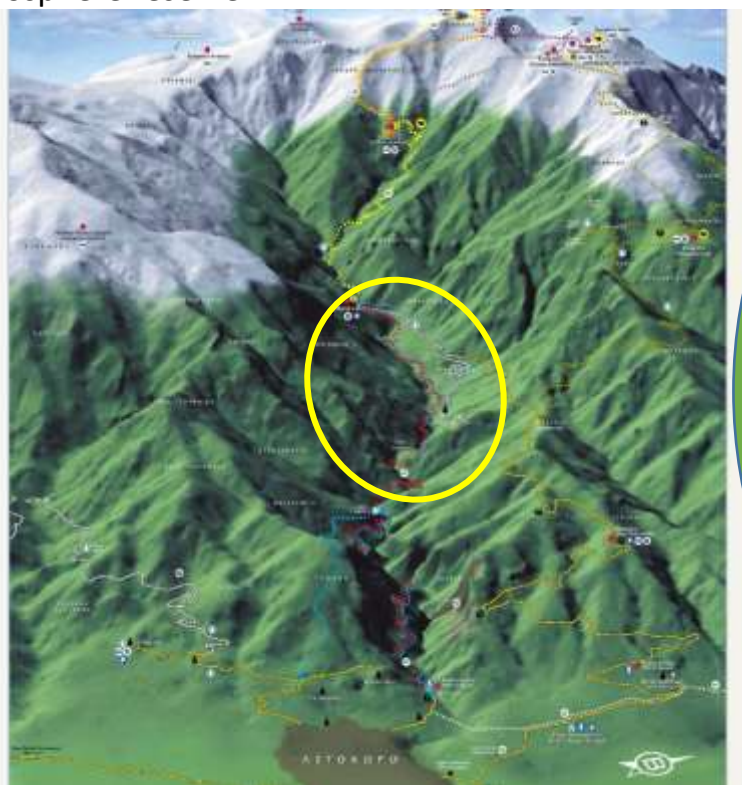

Please see more information in

<https://olympusfd.gr/en/flora/>

<https://olympusfd.gr/en/avifauna/>

<https://olympusfd.gr/en/mammals/>

<https://olympusfd.gr/en/amphibians-and-reptiles/>

<https://olympusfd.gr/en/invertebrates/>

**i** *In the wider area of Olympus have been recorded:*

- ✓ *Around 150 species of birds*
- ✓ *More than 40 species of mammals*
- ✓ *34 species of amphibians and reptiles*
- ✓ *275 species of invertebrates*
- ✓ *Over 1700 species of plants representing 25% of all Greek flora*
- ✓ *23 plant taxa with a geographical distribution only to Olympus area*

## What could you have seen during the tour (if you need more space, please add)?

|                                                                                                                                                                                                           |                                                                                     |
|-----------------------------------------------------------------------------------------------------------------------------------------------------------------------------------------------------------|-------------------------------------------------------------------------------------|
| <b>ANIMAL FOOTPRINTS</b><br>Please see the links in the previous page for animals and try to find in the web, footprints of 5 species existing in Olympus Biosphere Reserve. Write the links in the table |  |
| Name of the animal                                                                                                                                                                                        | Photo of the foot print                                                             |
|                                                                                                                                                                                                           |                                                                                     |
|                                                                                                                                                                                                           |                                                                                     |
|                                                                                                                                                                                                           |                                                                                     |
|                                                                                                                                                                                                           |                                                                                     |
|                                                                                                                                                                                                           |                                                                                     |

|                                                                                                                                                                                                          |                                                                                     |
|----------------------------------------------------------------------------------------------------------------------------------------------------------------------------------------------------------|-------------------------------------------------------------------------------------|
| <b>ANIMAL SOUNDS</b><br>Please see the links in the previous page for animals and try to find in the web, animal sounds of 5 species existing in Olympus Biosphere Reserve. Write the links in the table |  |
| Name of the animal                                                                                                                                                                                       | Recording                                                                           |
|                                                                                                                                                                                                          |                                                                                     |
|                                                                                                                                                                                                          |                                                                                     |
|                                                                                                                                                                                                          |                                                                                     |
|                                                                                                                                                                                                          |                                                                                     |
|                                                                                                                                                                                                          |                                                                                     |

|                                                                                                                                                                                                                                                                                       |                                                                                       |
|---------------------------------------------------------------------------------------------------------------------------------------------------------------------------------------------------------------------------------------------------------------------------------------|---------------------------------------------------------------------------------------|
| <b>NATIVE PLANTS</b><br>Please see the link <a href="https://olympusfd.gr/en/flora/">https://olympusfd.gr/en/flora/</a> and try to find in the web, 5 plant species existing in Olympus Biosphere Reserve. Write the links in the table                                               |  |
| Name of the plant                                                                                                                                                                                                                                                                     | Photo of the plant                                                                    |
| <i>Jankaea heldreichii</i> is a plant species that can be found only to Mount Olympus in Greece where it is a relict species from the tertiary period.<br>See:<br><a href="https://www.iucnredlist.org/species/162254/5564827">https://www.iucnredlist.org/species/162254/5564827</a> |   |
|                                                                                                                                                                                                                                                                                       |                                                                                       |
|                                                                                                                                                                                                                                                                                       |                                                                                       |
|                                                                                                                                                                                                                                                                                       |                                                                                       |
|                                                                                                                                                                                                                                                                                       |                                                                                       |

**Optional:** Try to remember plant species you see, or you have seen in Bermeo Biosphere Reserve.  
 Are there many differences? Why? Please add free text (and plant photos if you have) here (if you need more space, please add):

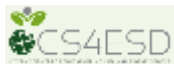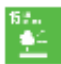

*When you walk in your city or village, please make five (or more) photos of different plant species (not cultivated ones) and try to find their names uploading photos to [“i-naturalist”](https://www.inaturalist.org/) (see how to <https://www.inaturalist.org/>), or to “FLORA INCOGNITA ([https://floraincognita.com/apps/flora-incognita-app/?noredirect=en\\_US](https://floraincognita.com/apps/flora-incognita-app/?noredirect=en_US)).*

Add the photos and their names here (if you need more space, please add):

| <i>Plant name</i> | <i>Photo</i> |
|-------------------|--------------|
|                   |              |
|                   |              |
|                   |              |
|                   |              |
|                   |              |

**i** *Olympus is characterized by a wide variety of vegetation types.*

Please see information in <https://olympusfd.gr/en/vegetation-zones/> and mark those type of vegetation that you can find in the Olympus Biosphere Reserve.

|                                                                                                                                                                                                   |                                                                                      |  |
|---------------------------------------------------------------------------------------------------------------------------------------------------------------------------------------------------|--------------------------------------------------------------------------------------|--|
| Conifer forests<br><input type="checkbox"/>                                                                                                                                                       |    |  |
| Evergreen sclerophyllous vegetation<br><input type="checkbox"/>                                                                                                                                   |    |  |
| Meadows and grasslands<br><input type="checkbox"/>                                                                                                                                                |    |  |
| Azonal vegetation<br><input type="checkbox"/>                                                                                                                                                     |   |  |
| Marshes<br><input type="checkbox"/>                                                                                                                                                               |  |  |
| Tropical rainforest<br><input type="checkbox"/>                                                                                                                                                   |  |  |
| Shrubland<br><input type="checkbox"/>                                                                                                                                                             |  |  |
| Please add more vegetation types if there are in <a href="https://olympusfd.gr/en/vegetation-zones/">https://olympusfd.gr/en/vegetation-zones/</a><br><b>(if you need more space, please add)</b> | Try to find photos of the vegetation types in the web                                |  |
|                                                                                                                                                                                                   |                                                                                      |  |

**Optional:** Try to remember vegetation types you see, or you have seen in Bermeo Biosphere Reserve. Are there many differences? Why? Please add free text here (if you need more space, please add)

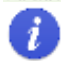

*Many and varied benefits humans gain from the Olympus Biosphere Reserve.*

Please mark those services that in your opinion the Olympus Biosphere Reserve offers us (list of ecosystem services based on “The Economics of Ecosystems and Biodiversity” (TEEB 2015, <http://www.teebweb.org/resources/ecosystem-services/>).

**PROVISIONING SERVICES (products obtained from ecosystems)**

- ☐ Food
- ☐ Fresh water
- ☐ Raw Materials
- ☐ Renewable energy
- ☐ Natural medicines-Medicinal resources

**REGULATING SERVICES (benefits obtained from regulation of ecosystem processes)**

- ☐ Climate regulation
- ☐ Air quality regulation
- ☐ Hydrological cycle regulation
- ☐ Erosion control and maintenance of soil fertility
- ☐ Pollination
- ☐ Biological control

**HABITAT OR SUPPORTING SERVICES**

- ☐ Habitats for species
- ☐ Maintenance of genetic diversity

**CULTURAL SERVICES (non-material benefits obtained from ecosystems)**

- ☐ Leisure
- ☐ Recreation and mental and physical health
- ☐ Scientific knowledge
- ☐ Environmental education
- ☐ Tradition knowledge
- ☐ Enjoy the aesthetics of the landscape
- ☐ Tourism

**Optional:** Try to remember the services you have marked for Bermeo Biosphere Reserve.

Are there many differences? Why? Please add free text here (if you need more space, please add)



## How important different ecosystem services are to you in general.

Please circle one number on the scale, from 6 (Highly valued) to 0 (Least valued).

| Ecosystem services                                          | 6 | 5 | 4 | 3 | 2 | 1 | 0 |
|-------------------------------------------------------------|---|---|---|---|---|---|---|
| Air quality regulation                                      |   |   |   |   |   |   |   |
| Clean water/Water quality                                   |   |   |   |   |   |   |   |
| Regulation of Water flows: Less storm runoff / flood damage |   |   |   |   |   |   |   |
| Mitigate or lessen changes in climate                       |   |   |   |   |   |   |   |
| Block ultraviolet radiation                                 |   |   |   |   |   |   |   |
| Wildlife habitat                                            |   |   |   |   |   |   |   |
| Biodiversity                                                |   |   |   |   |   |   |   |
| Opportunities for contact with nature                       |   |   |   |   |   |   |   |
| Provide products (e.g. fruits, nuts, wild mushrooms)        |   |   |   |   |   |   |   |
| Contribute to your sense of well being                      |   |   |   |   |   |   |   |
| Cultural heritage value                                     |   |   |   |   |   |   |   |
| Opportunities for contact with cultural environment         |   |   |   |   |   |   |   |
| Ecotourism                                                  |   |   |   |   |   |   |   |
| Recreation                                                  |   |   |   |   |   |   |   |
| Cultural diversity                                          |   |   |   |   |   |   |   |
| Aesthetic quality                                           |   |   |   |   |   |   |   |
| Waste treatment                                             |   |   |   |   |   |   |   |
| Disturbance moderation                                      |   |   |   |   |   |   |   |
| Pollination                                                 |   |   |   |   |   |   |   |
| Biological control                                          |   |   |   |   |   |   |   |

Try to find in scholar google scientific publications using the hey word “ecosystem services”.

How many have you found? Paste here at least 5 different links (if you need more space, please add)

Forest ecosystems and wetlands provide the same ecosystem services or there are differences? What is your opinion? Please add free text here (you can also try to find information in the web but then don't forget to add the link (s), (if you need more space, please add).

## What is the importance of plants?

- Please circle one number on the scale, from 6 (Highly valued) to 0 (Least valued).

| Importance of plants                                                                                                                   | 6 | 5 | 4 | 3 | 2 | 1 | 0 |
|----------------------------------------------------------------------------------------------------------------------------------------|---|---|---|---|---|---|---|
| Plants photosynthesize                                                                                                                 |   |   |   |   |   |   |   |
| Plants provide fresh oxygen to breathe.                                                                                                |   |   |   |   |   |   |   |
| Plants help in reducing the pollution level by taking carbon dioxide and giving out the oxygen.                                        |   |   |   |   |   |   |   |
| Plants provide a habitat for other plants, animals, including humans, and microbes                                                     |   |   |   |   |   |   |   |
| Plants play an important role in influencing the climate                                                                               |   |   |   |   |   |   |   |
| They are the primary source of food for a number of birds, animals, and other organisms.                                               |   |   |   |   |   |   |   |
| They, especially trees, reduce erosion and prevent flooding                                                                            |   |   |   |   |   |   |   |
| A number of medicines are made by plants.                                                                                              |   |   |   |   |   |   |   |
| The woods that you get from plants can be used for a number of purposes. They are the source of furniture and provide shelter to many. |   |   |   |   |   |   |   |
| Other                                                                                                                                  |   |   |   |   |   |   |   |
| Other                                                                                                                                  |   |   |   |   |   |   |   |
| Other                                                                                                                                  |   |   |   |   |   |   |   |

a. Are you? ☐ Male ☐ Female

b. What is your age? \_\_\_\_\_

c. Are you living near or in the Biosphere Reserve?

☐ Yes ☐ No

d. Please indicate the highest level of education you have obtained? (Check only one)

☐ pupil ☐ High School Graduate ☐ student ☐ University graduate

enjoy!
